# Supplementary material for: NMR-Based Metabolomics for Geographical Discrimination of Adhatoda vasica Leaves
Source: MDPI journal article supplement (doi:10.3390/plants12030453), 2023-01-18
Supplement: s1 [file s1]

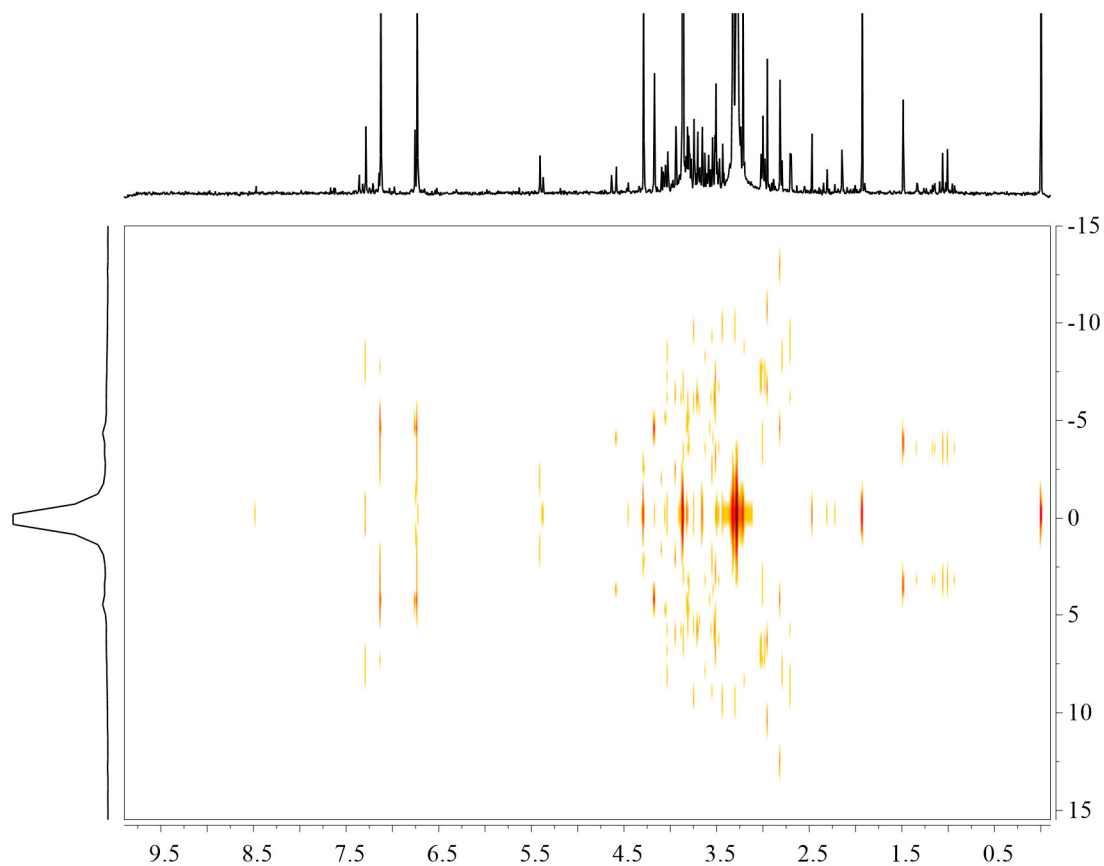

**Figure S1.** Supplementary data for *J*-Res spectra of *Adhatoda Vasica* leaf extract.

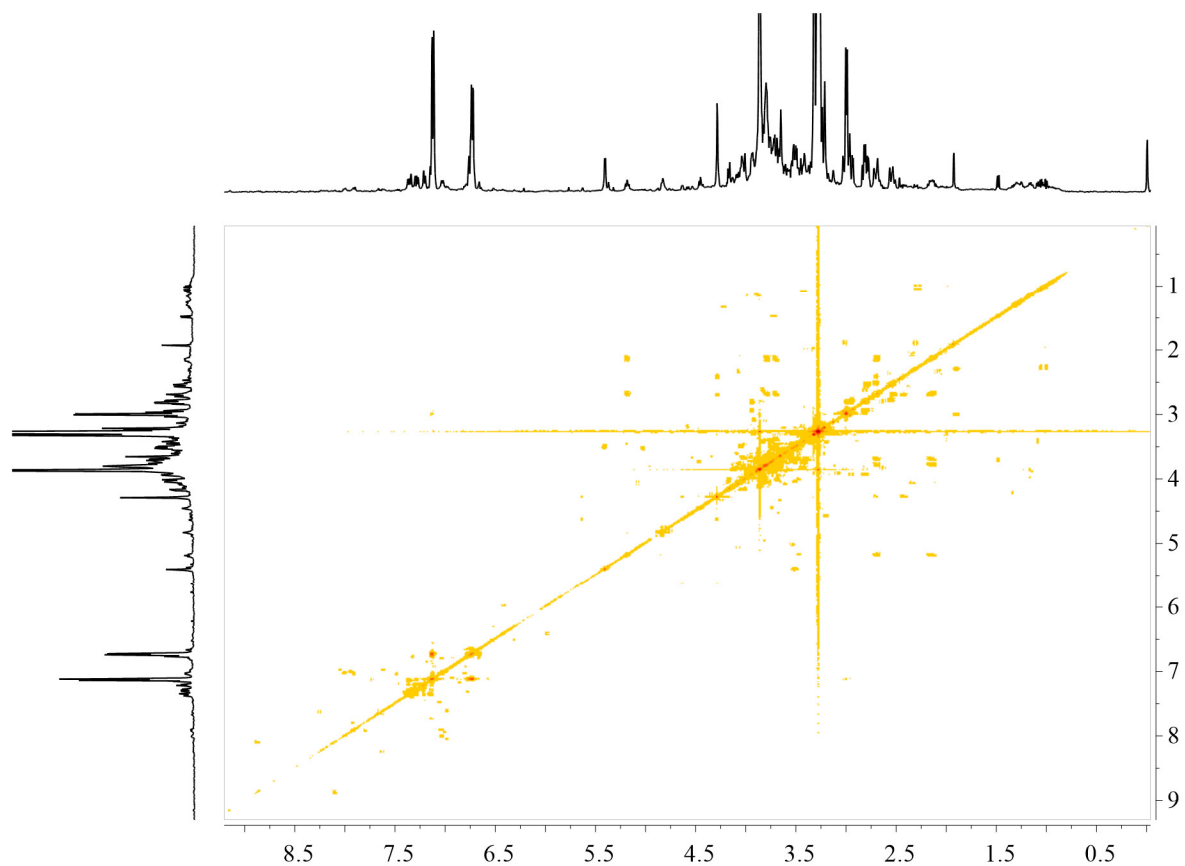

**Figure S2.** Supplementary data for  $^1\text{H}$  –  $^1\text{H}$  COSY spectra of *Adhatoda Vasica* leaf extract.

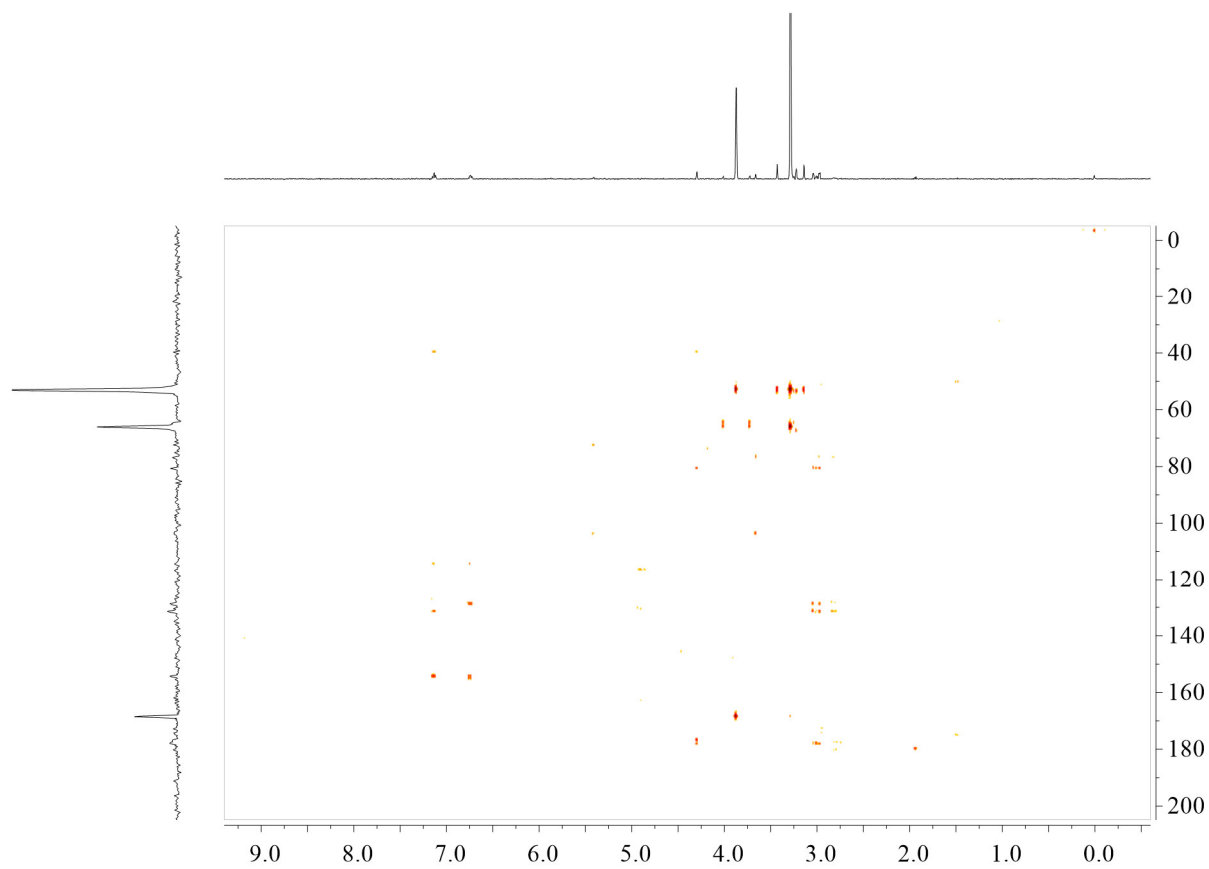

**Figure S3.** Supplementary data for  $^1\text{H}$ HMBC spectra of *Adhatoda Vasica* leaf extract.
